# Supplementary material for: Preparative separation of seven phenolic acids from Xanthii Fructus using pH-zone-refining counter-current chromatography combined with semi-preparative high performance liquid chromatography
Source: Royal Society of Chemistry journal article supplement (doi:10.1039/c9ra06969k), 2019-01-01
Supplement: c9ra06969k1.pdf [file c9ra06969k1.pdf]

Compound I Mass spectrum in positive ion mode

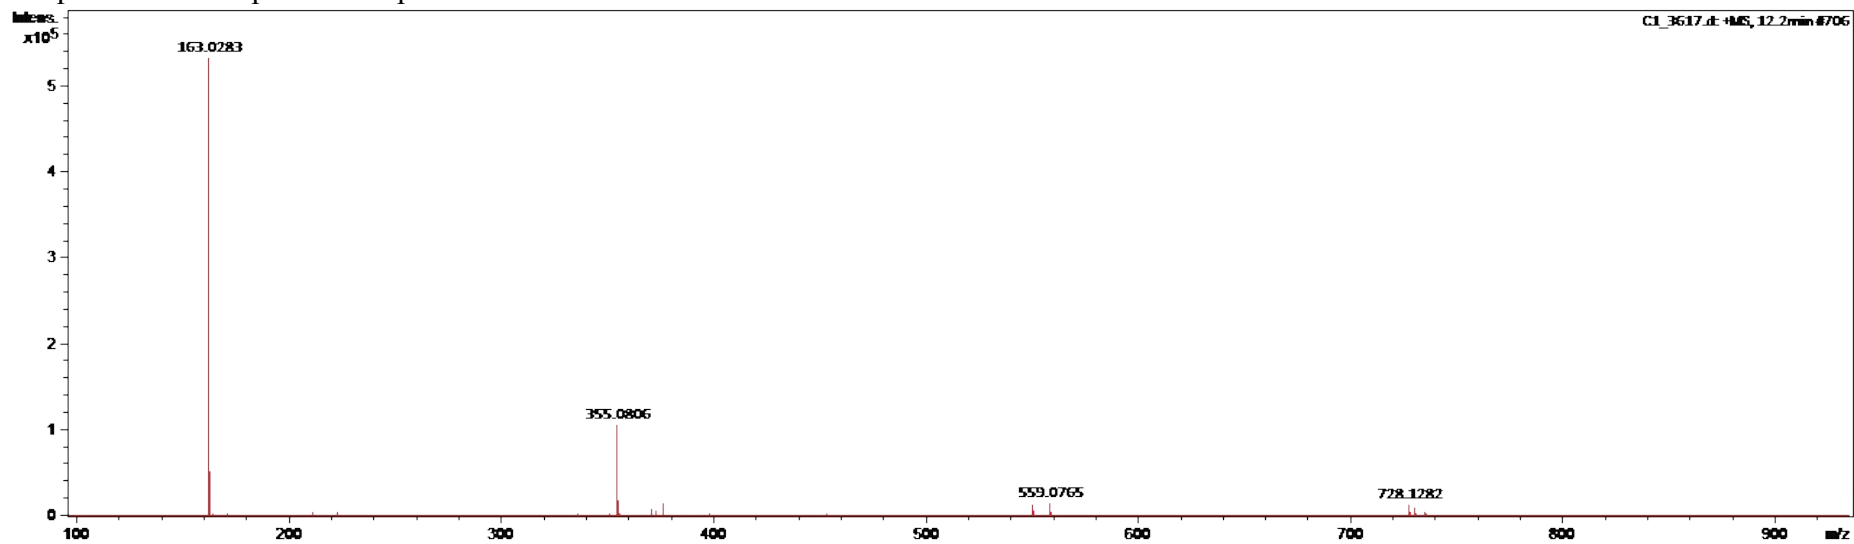

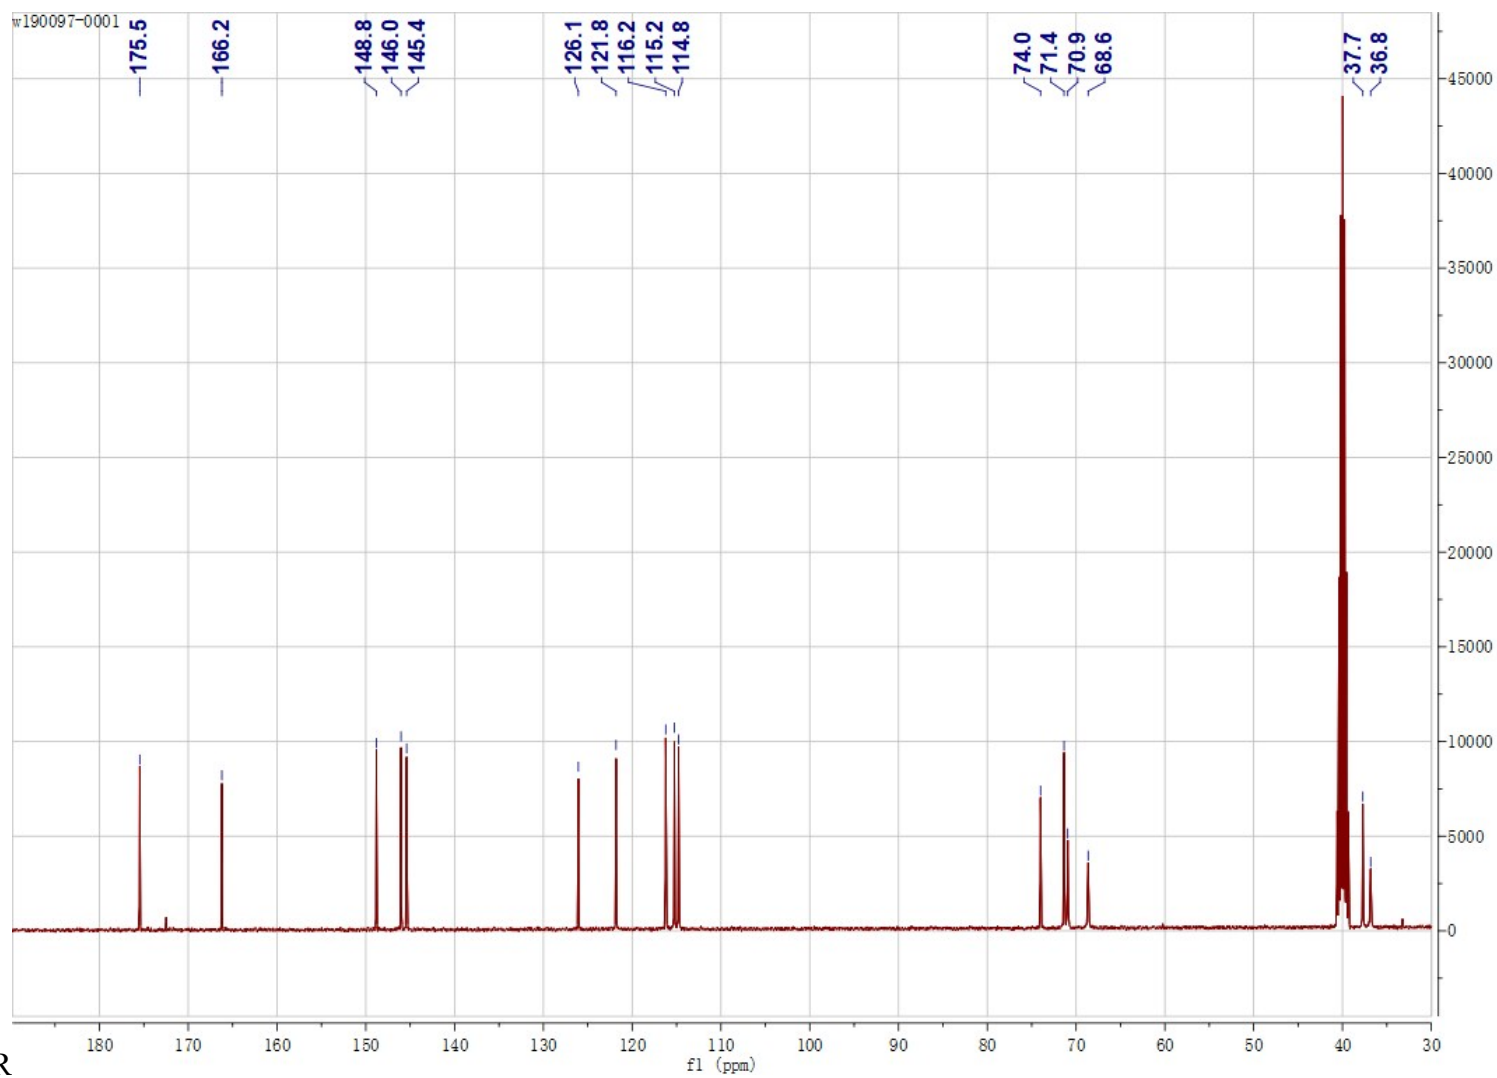

Compound I  $^{13}\text{C}$ -NMR

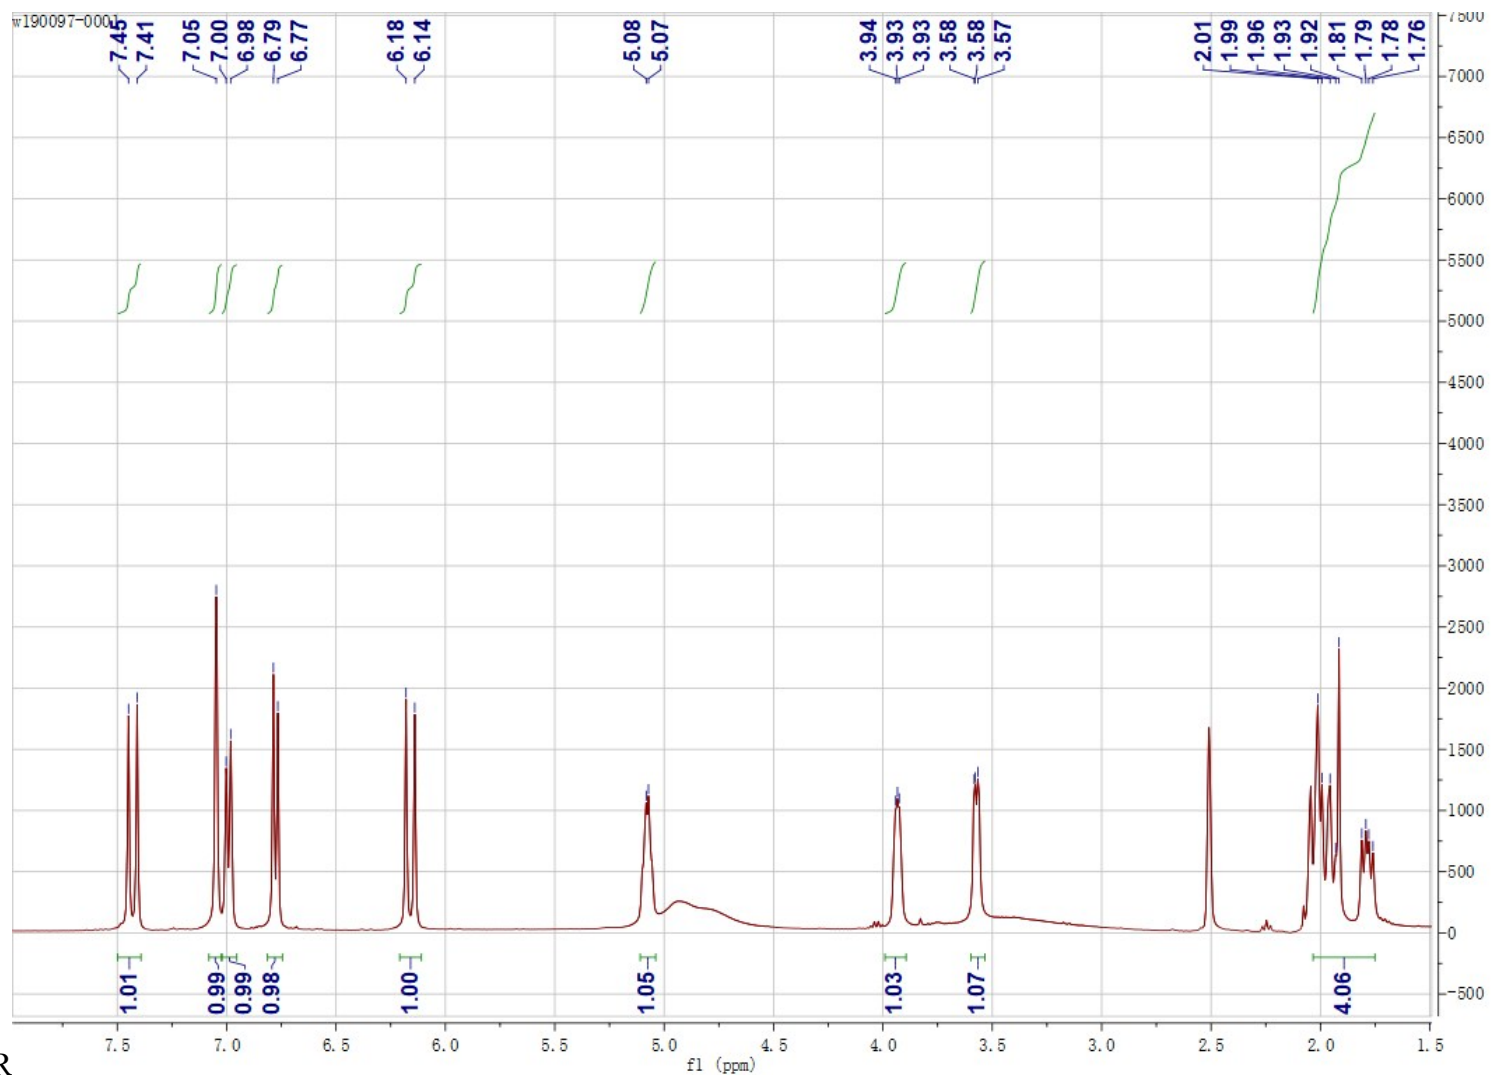

Compound I <sup>1</sup>H-NMR

Compound II Mass spectrum in positive ion mode

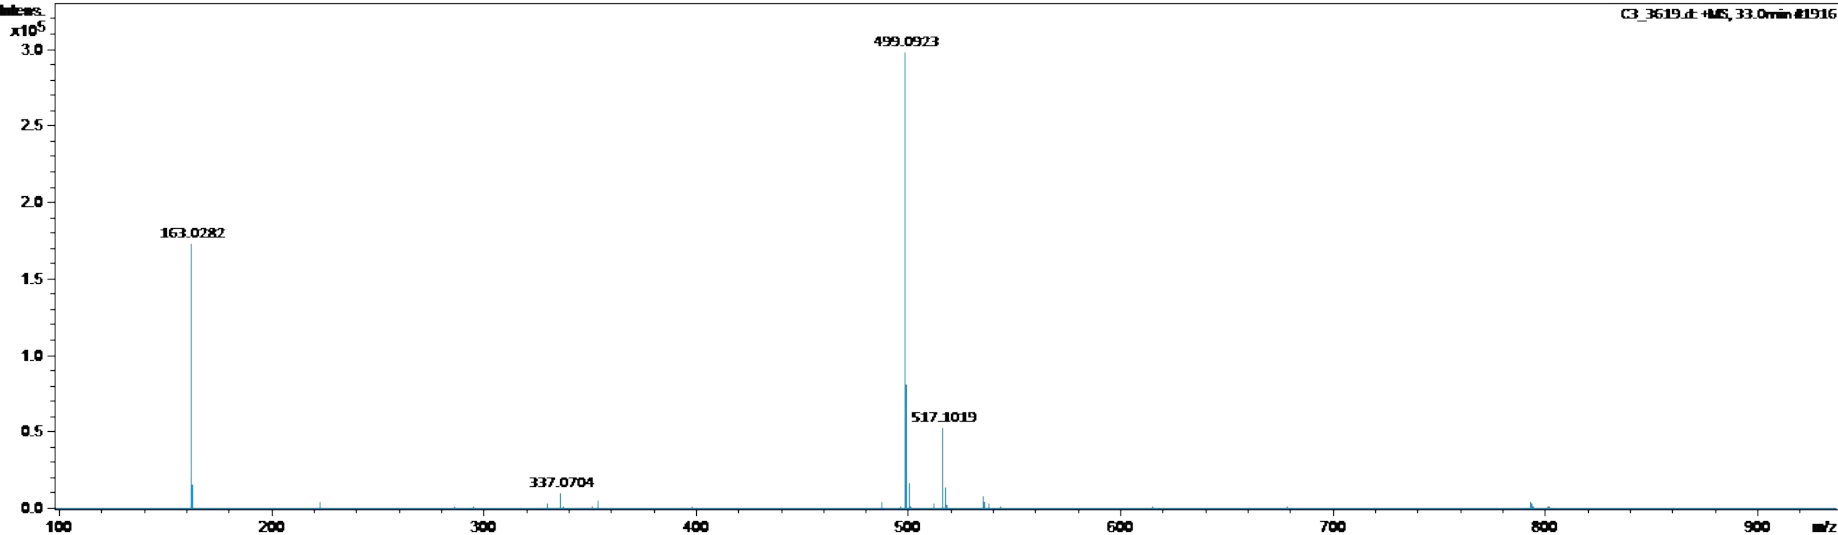

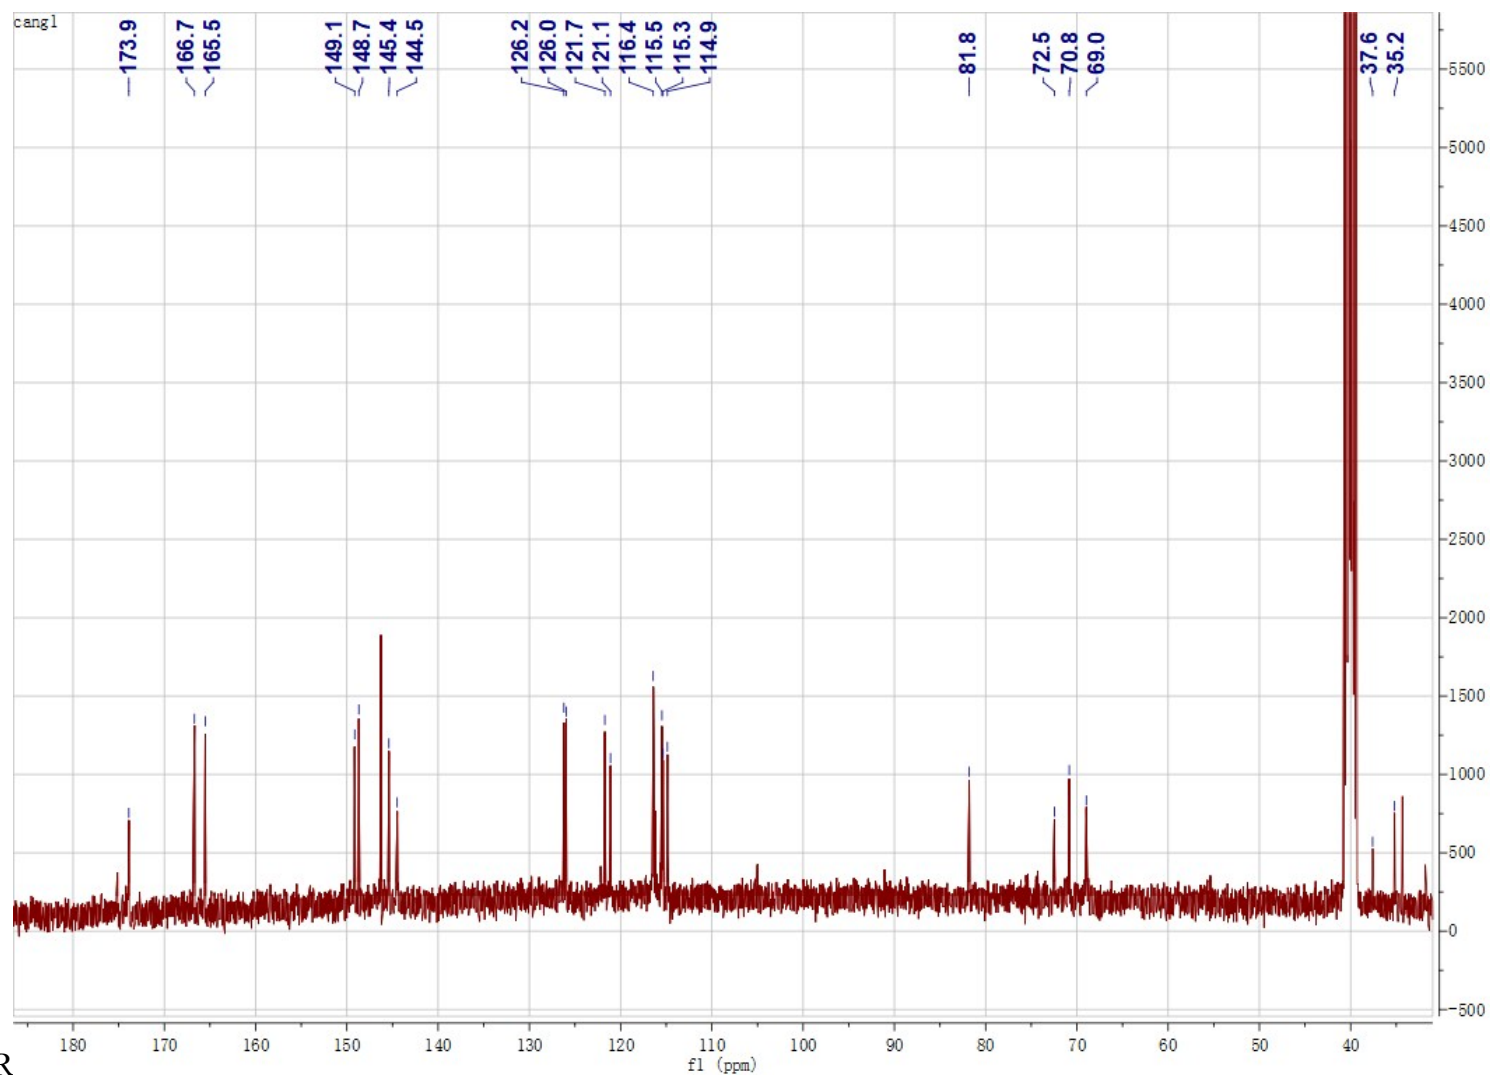

Compound II  $^{13}\text{C}$ -NMR

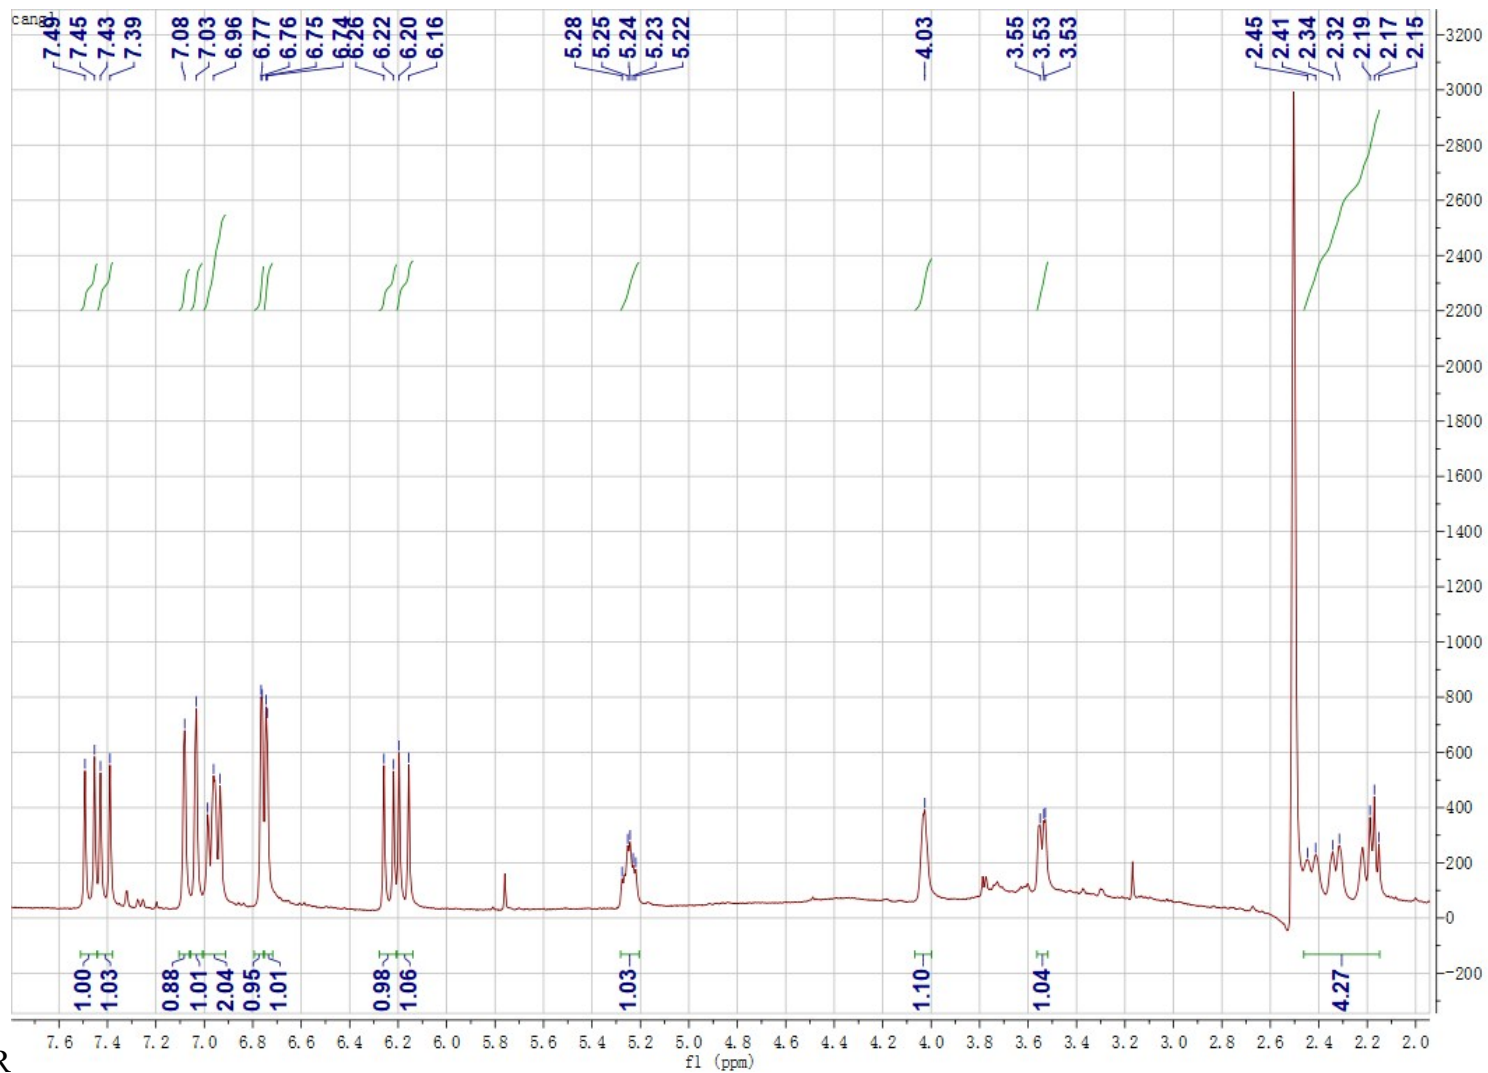

Compound II <sup>1</sup>H-NMR

Compound III Mass spectrum in positive ion mode

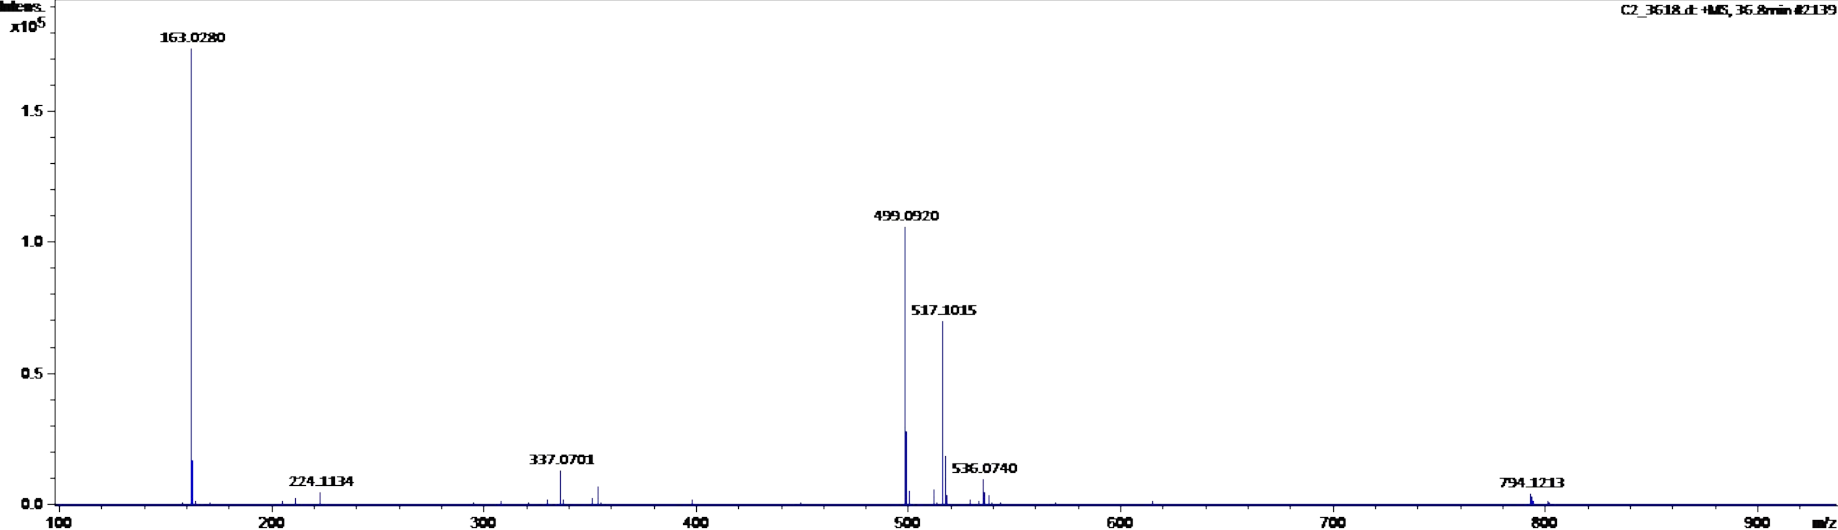

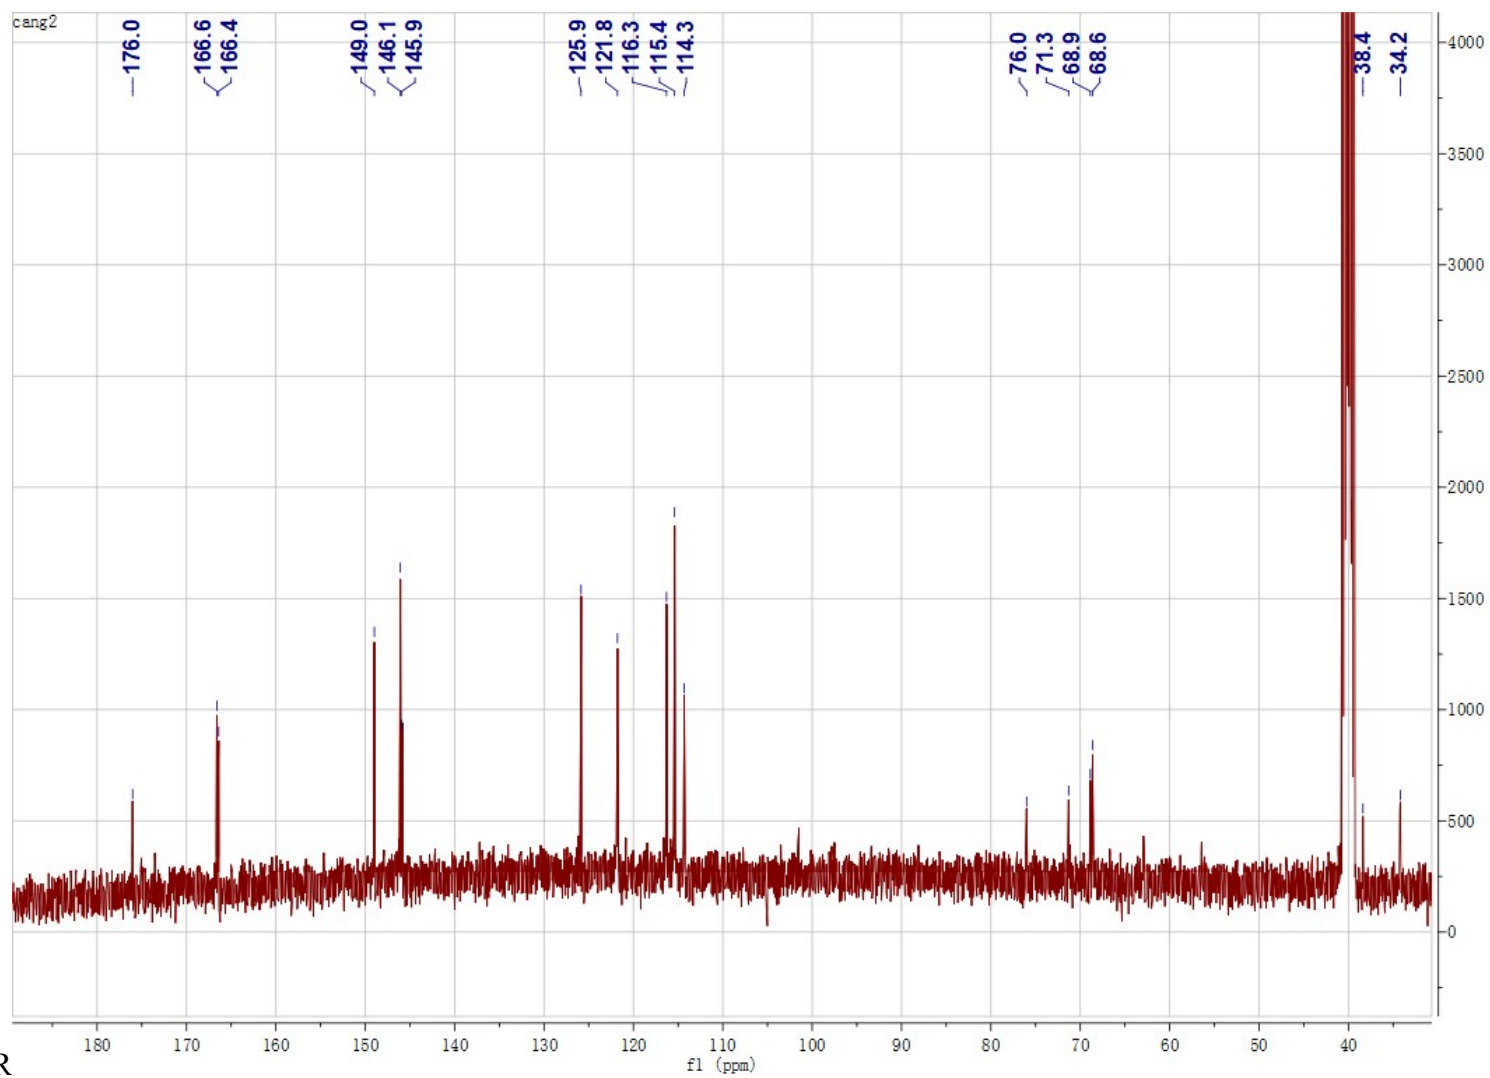

Compound III <sup>13</sup>C-NMR



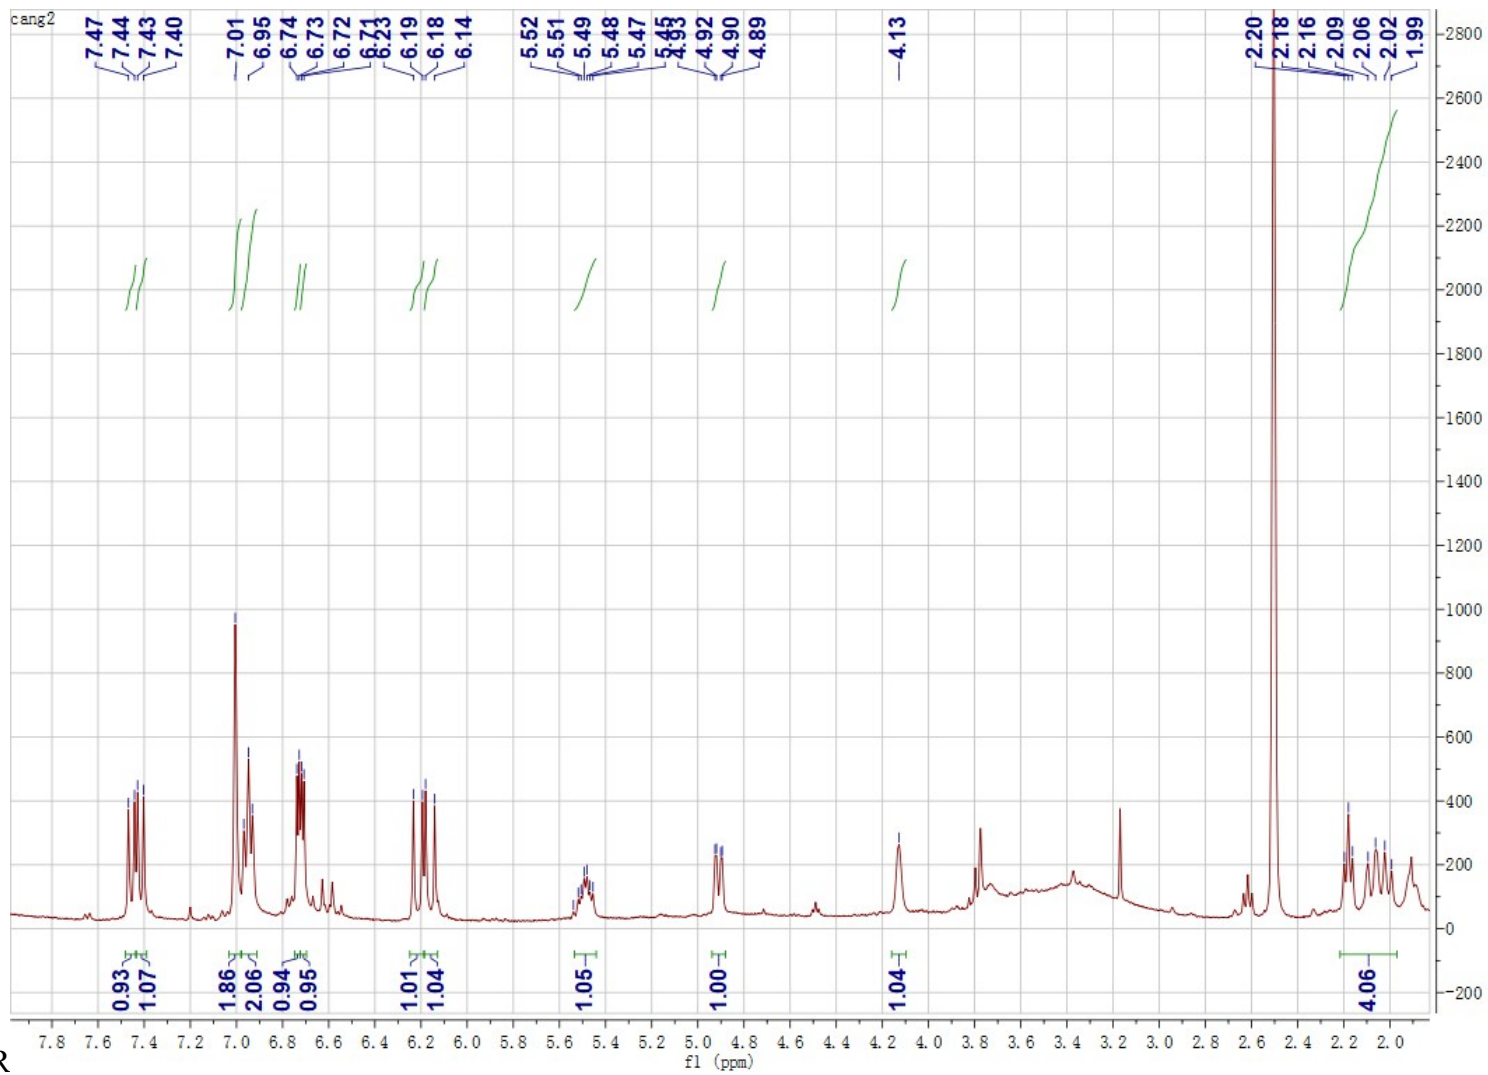

Compound III <sup>1</sup>H-NMR

Compound IV Mass spectrum in positive ion mode

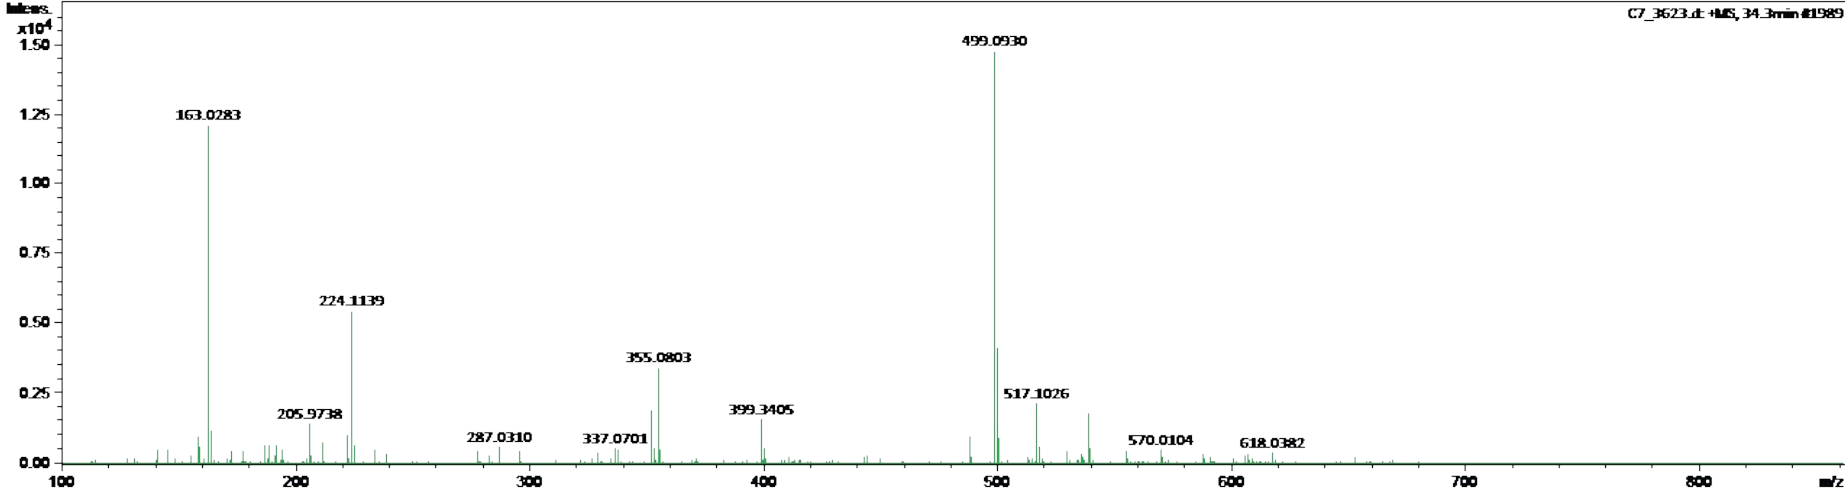

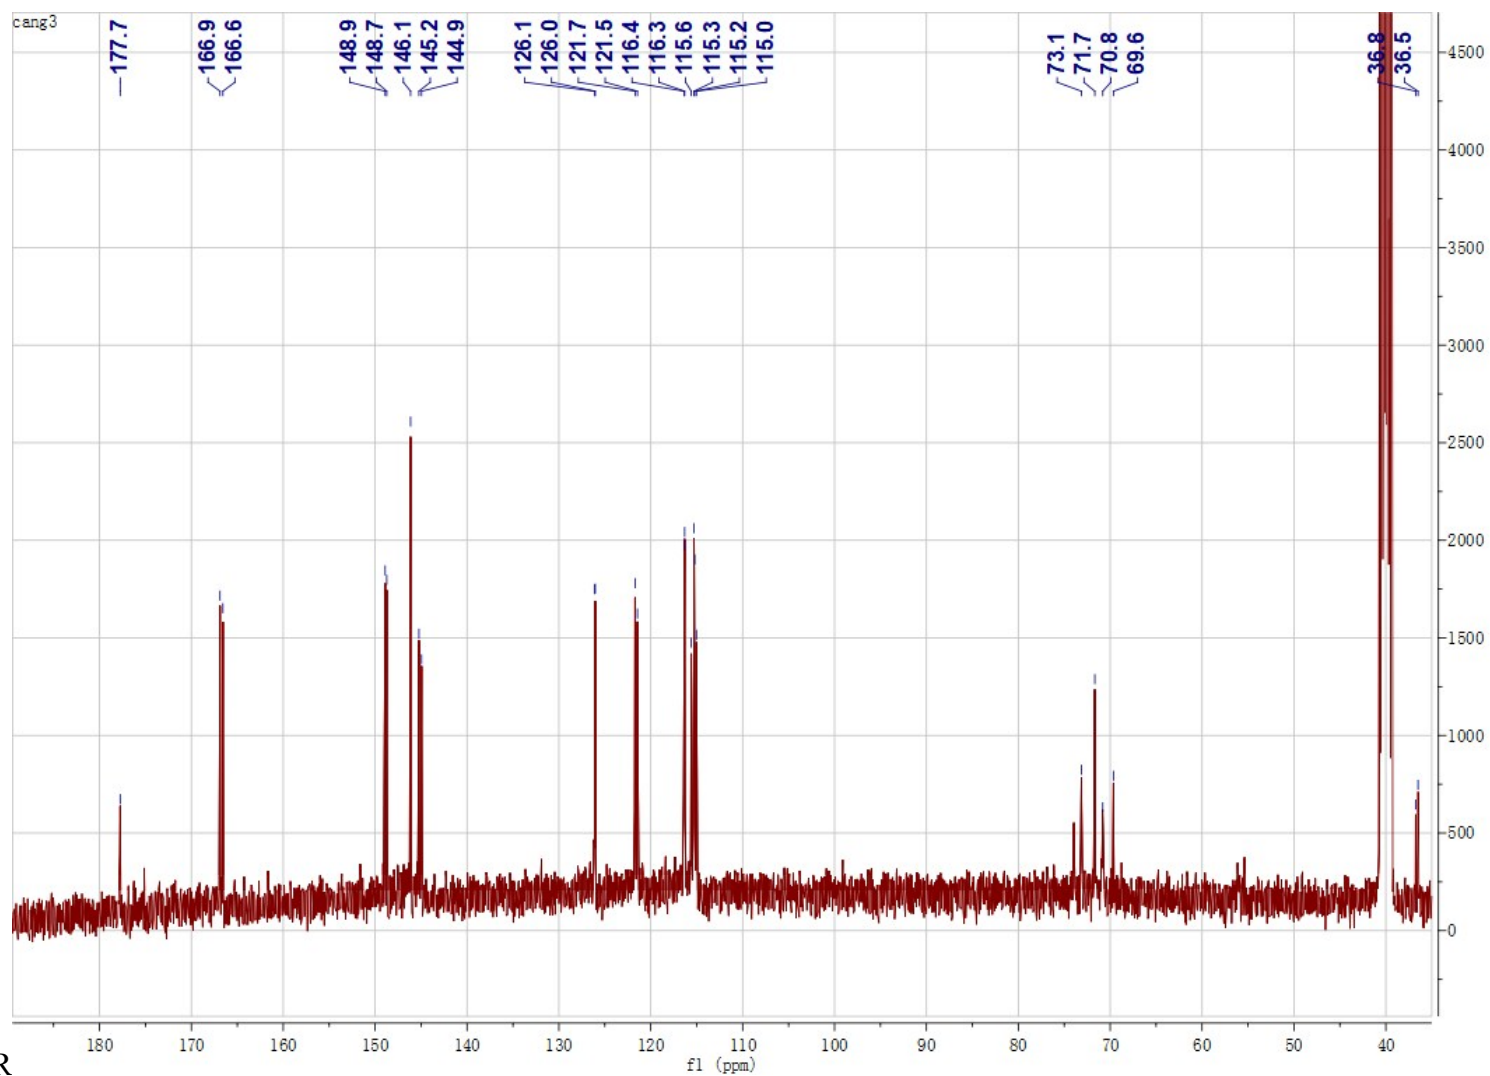

Compound IV  $^{13}\text{C}$ -NMR

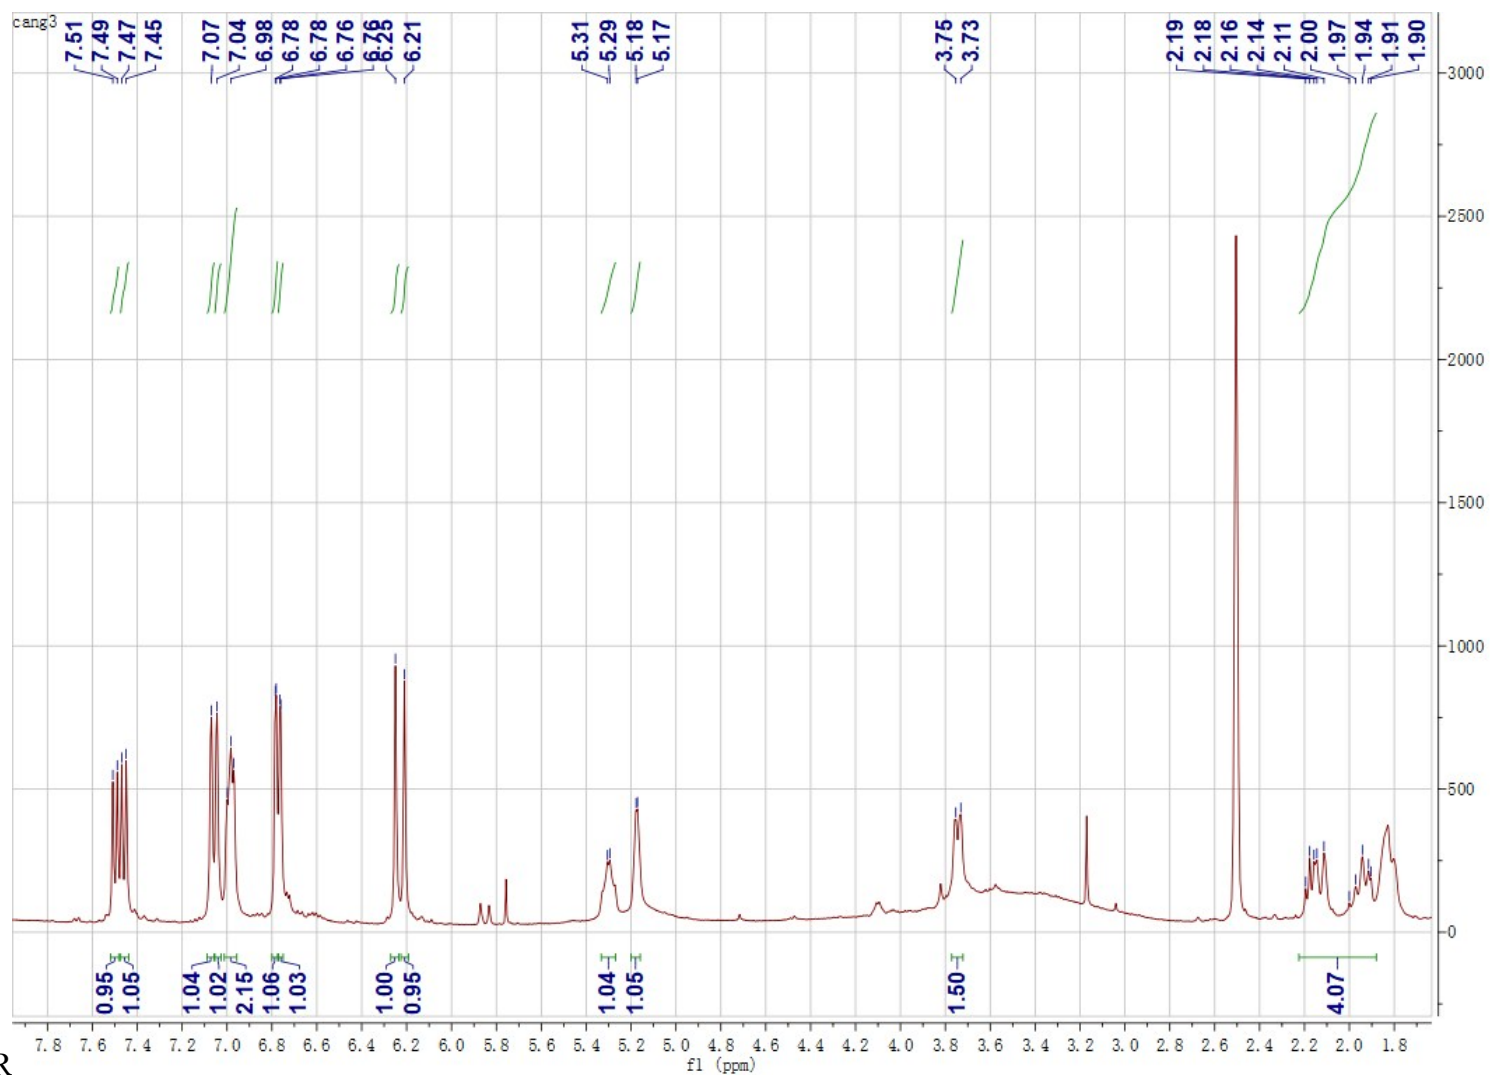

Compound IV <sup>1</sup>H-NMR

Compound V Mass spectrum in positive ion mode

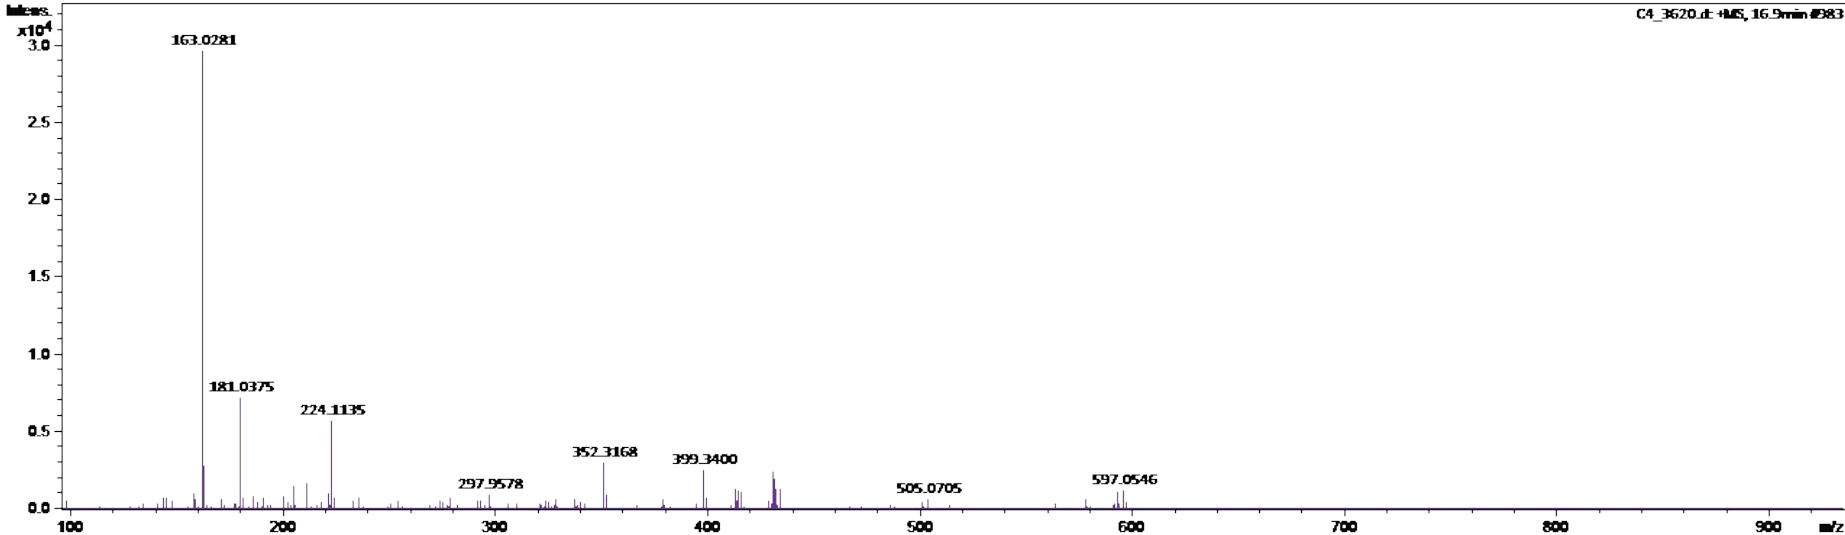

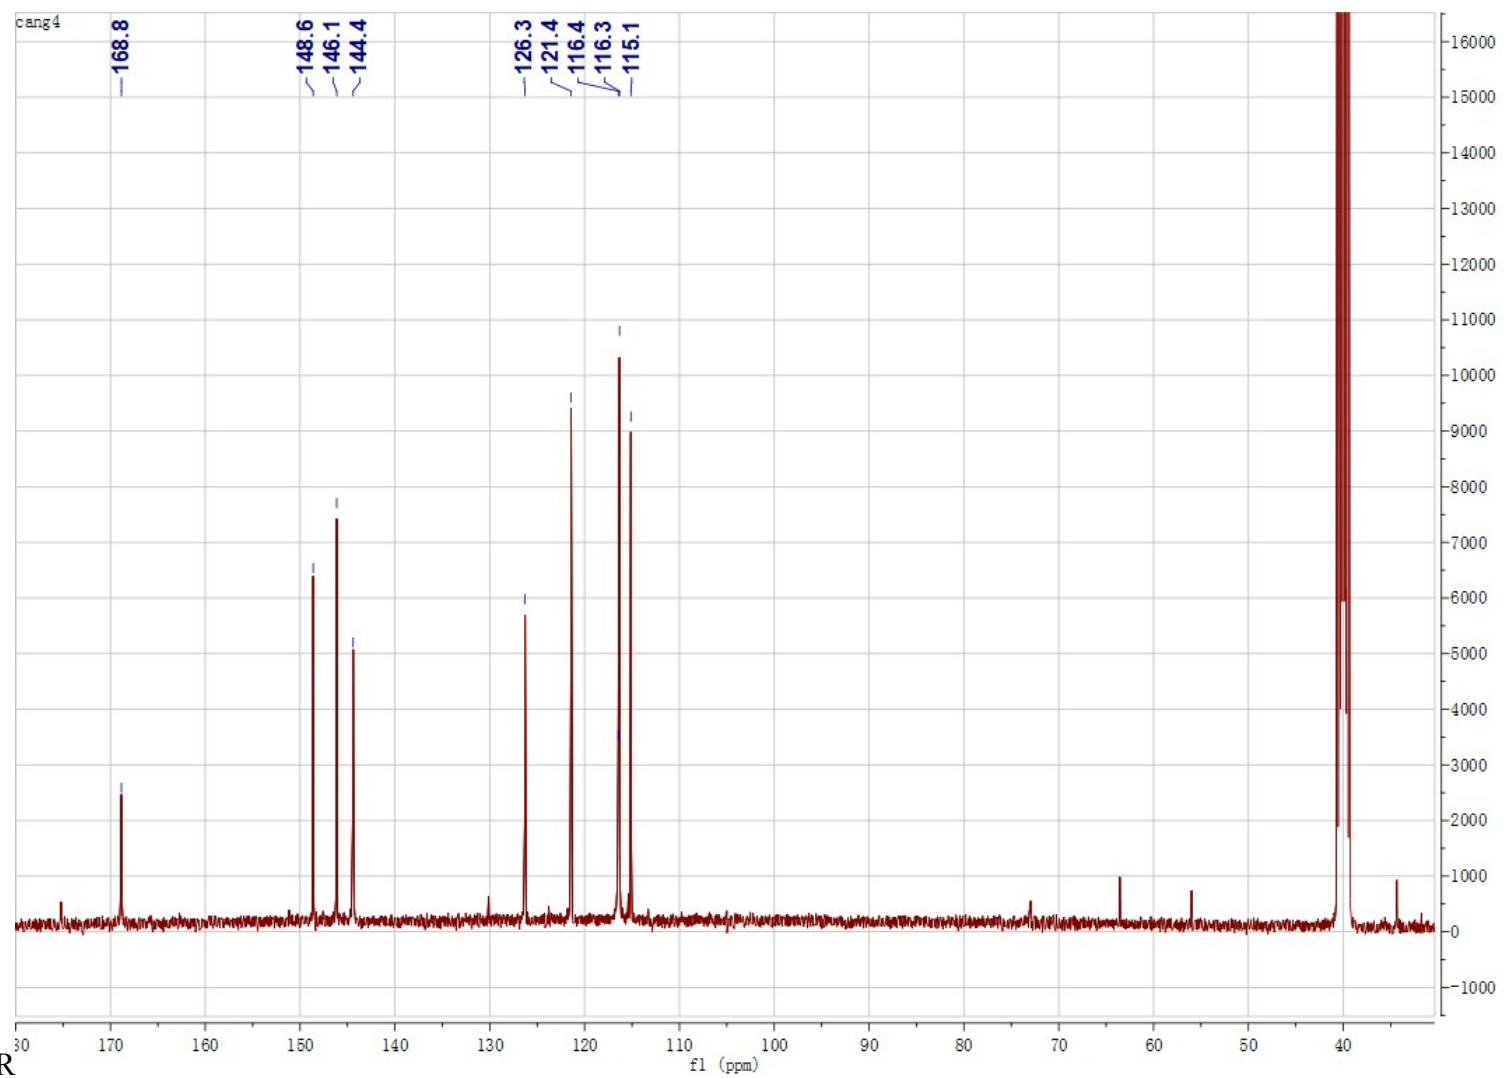

Compound V  $^{13}\text{C}$ -NMR

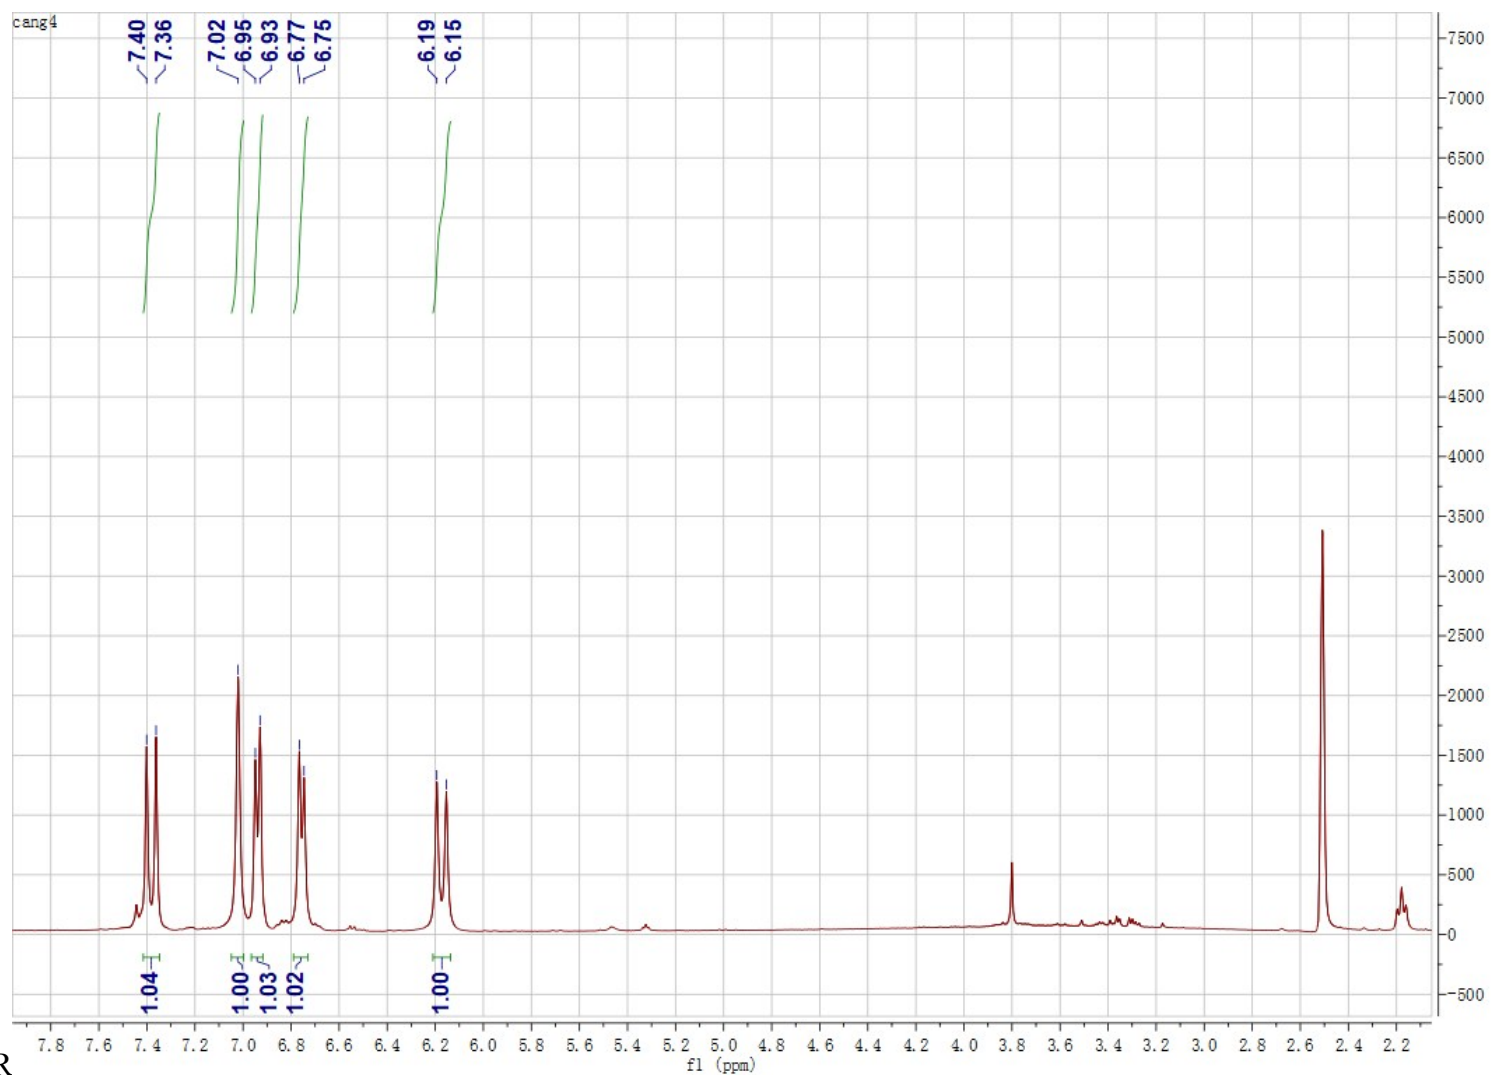

Compound V <sup>1</sup>H-NMR

Compound VI Mass spectrum in positive ion mode

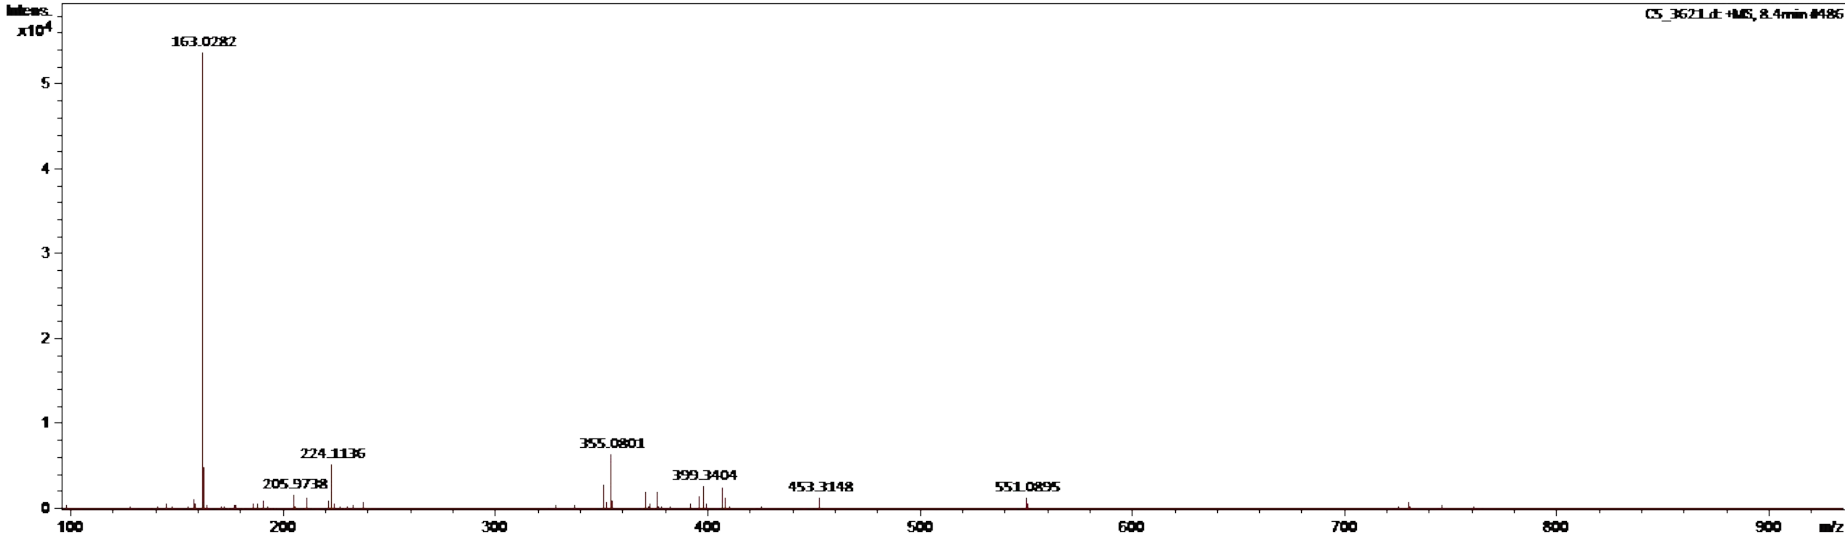



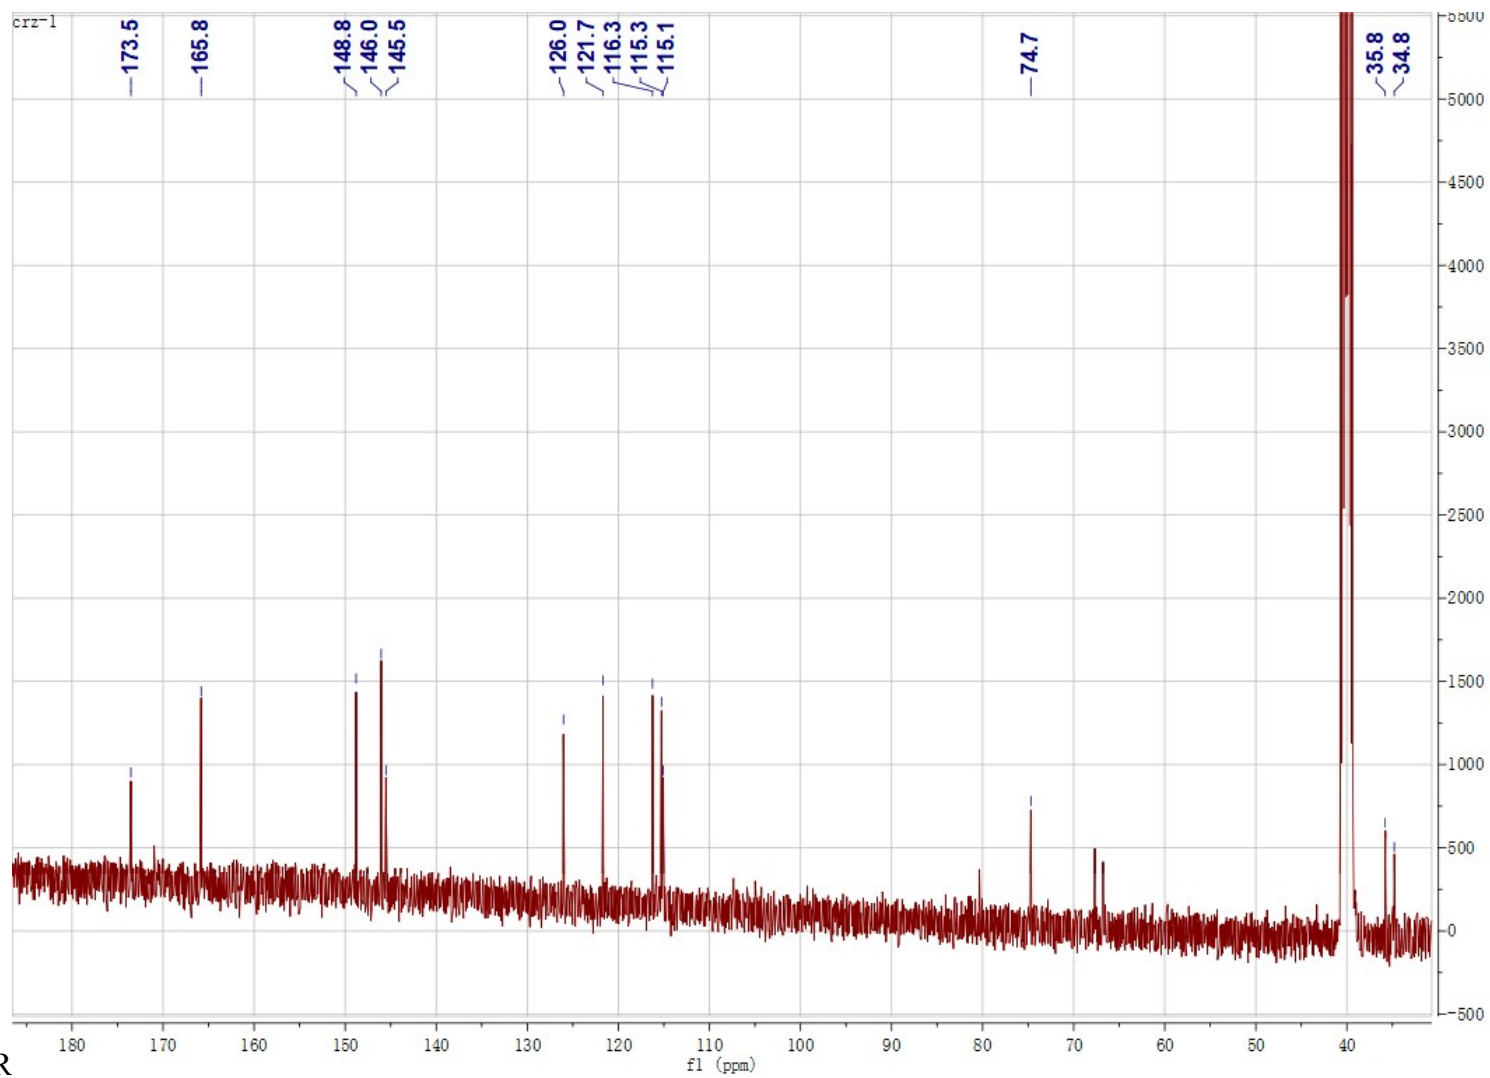

Compound VI  $^{13}\text{C}$ -NMR

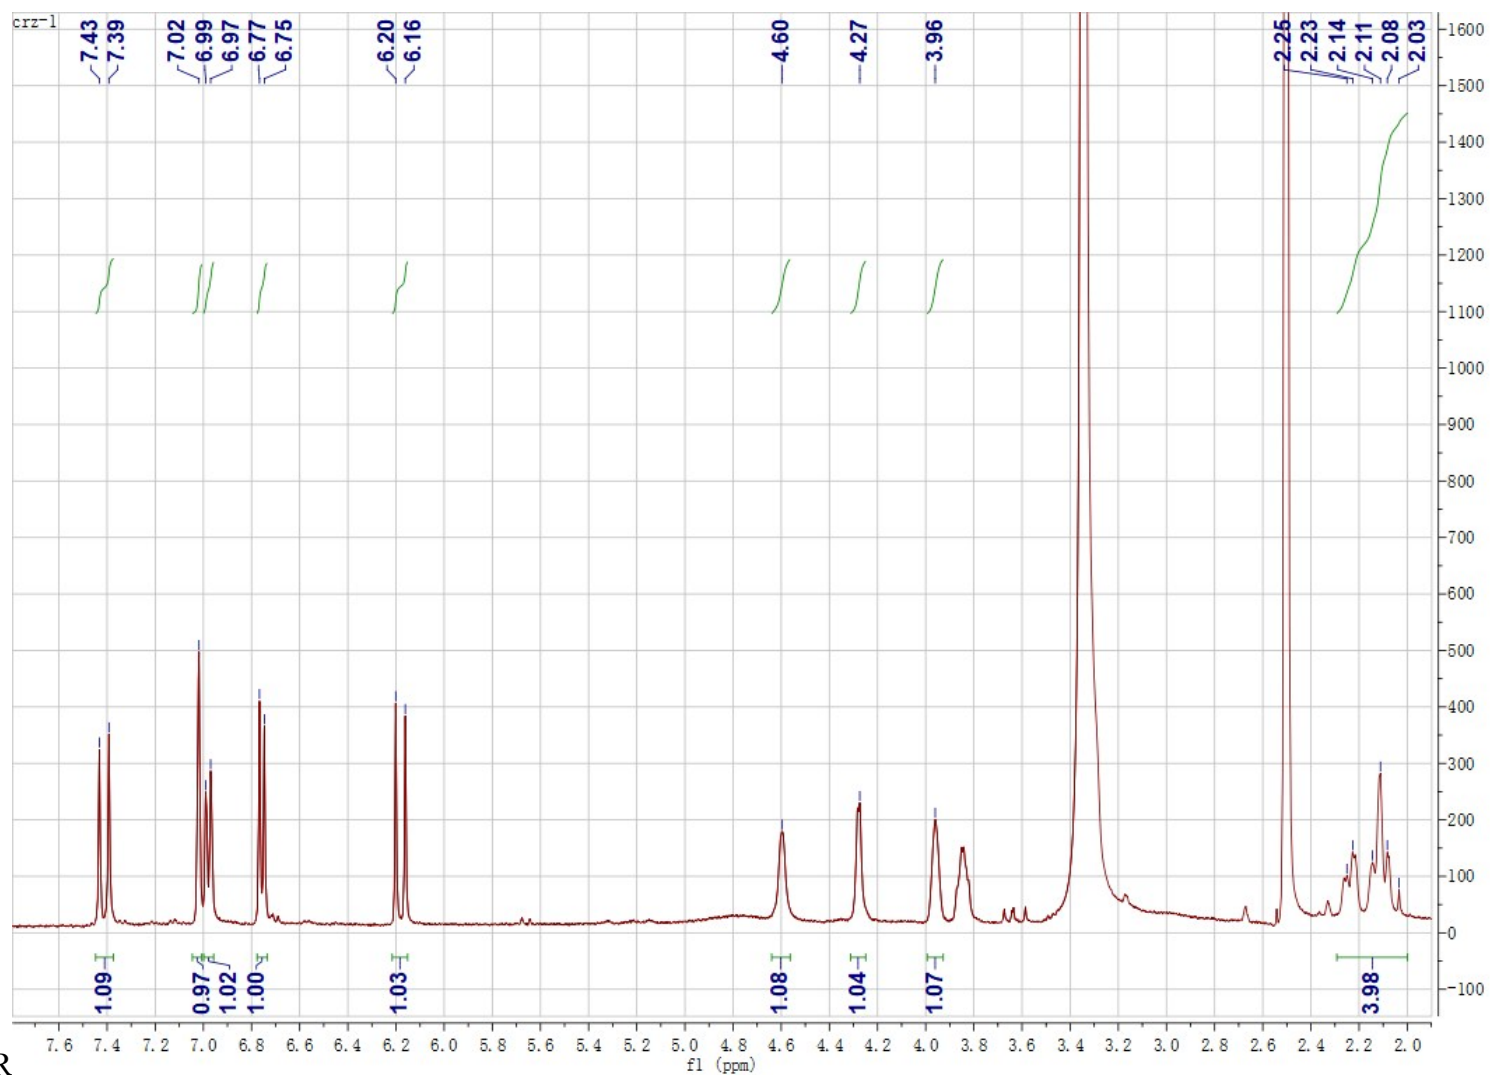

Compound VI <sup>1</sup>H-NMR

Compound VII Mass spectrum in positive ion mode

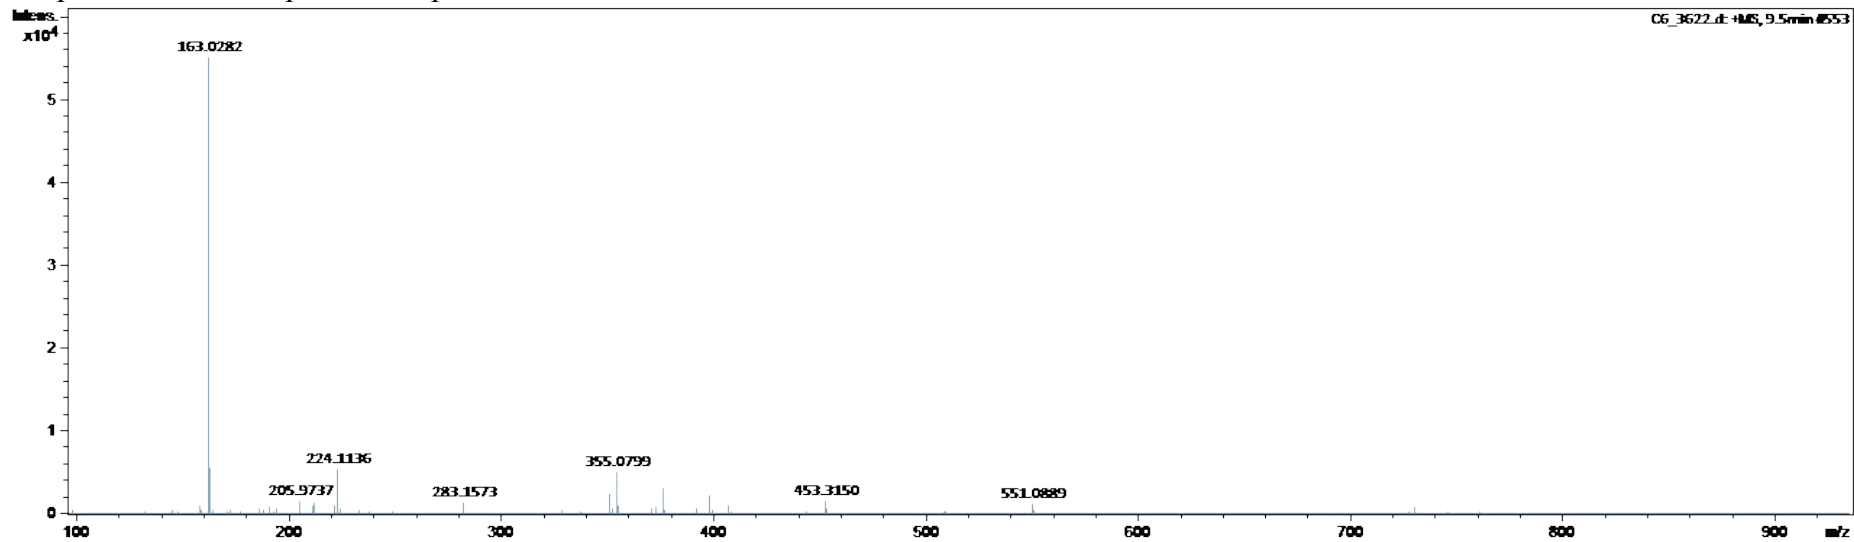

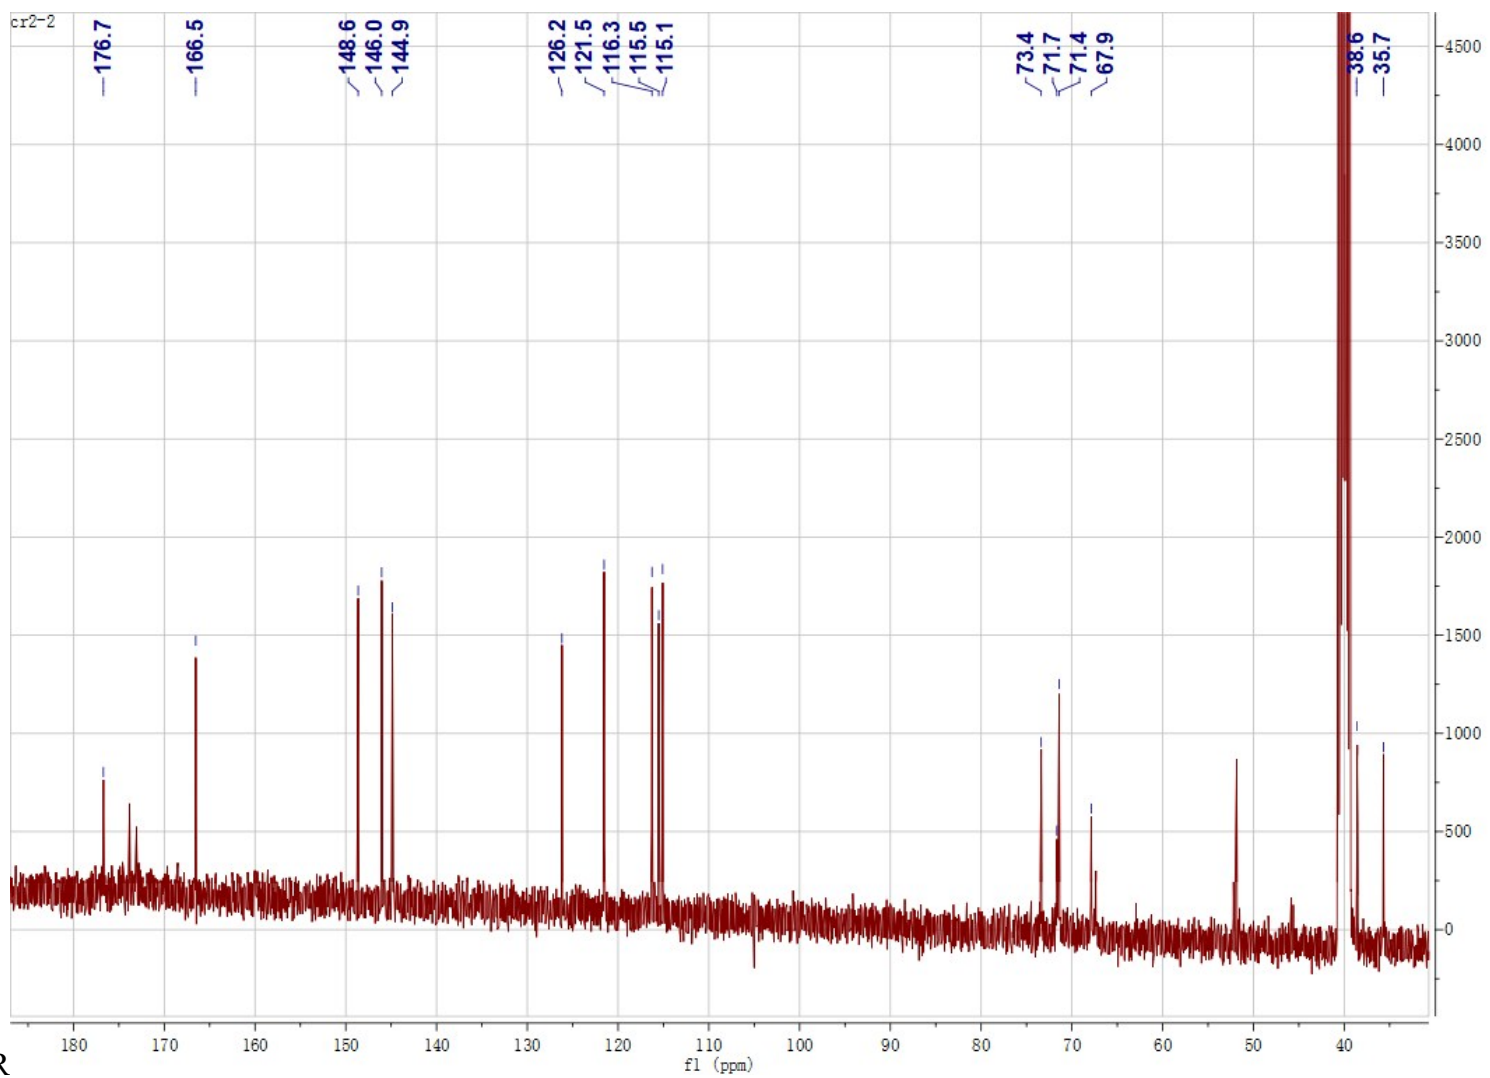

Compound VII  $^{13}\text{C}$ -NMR

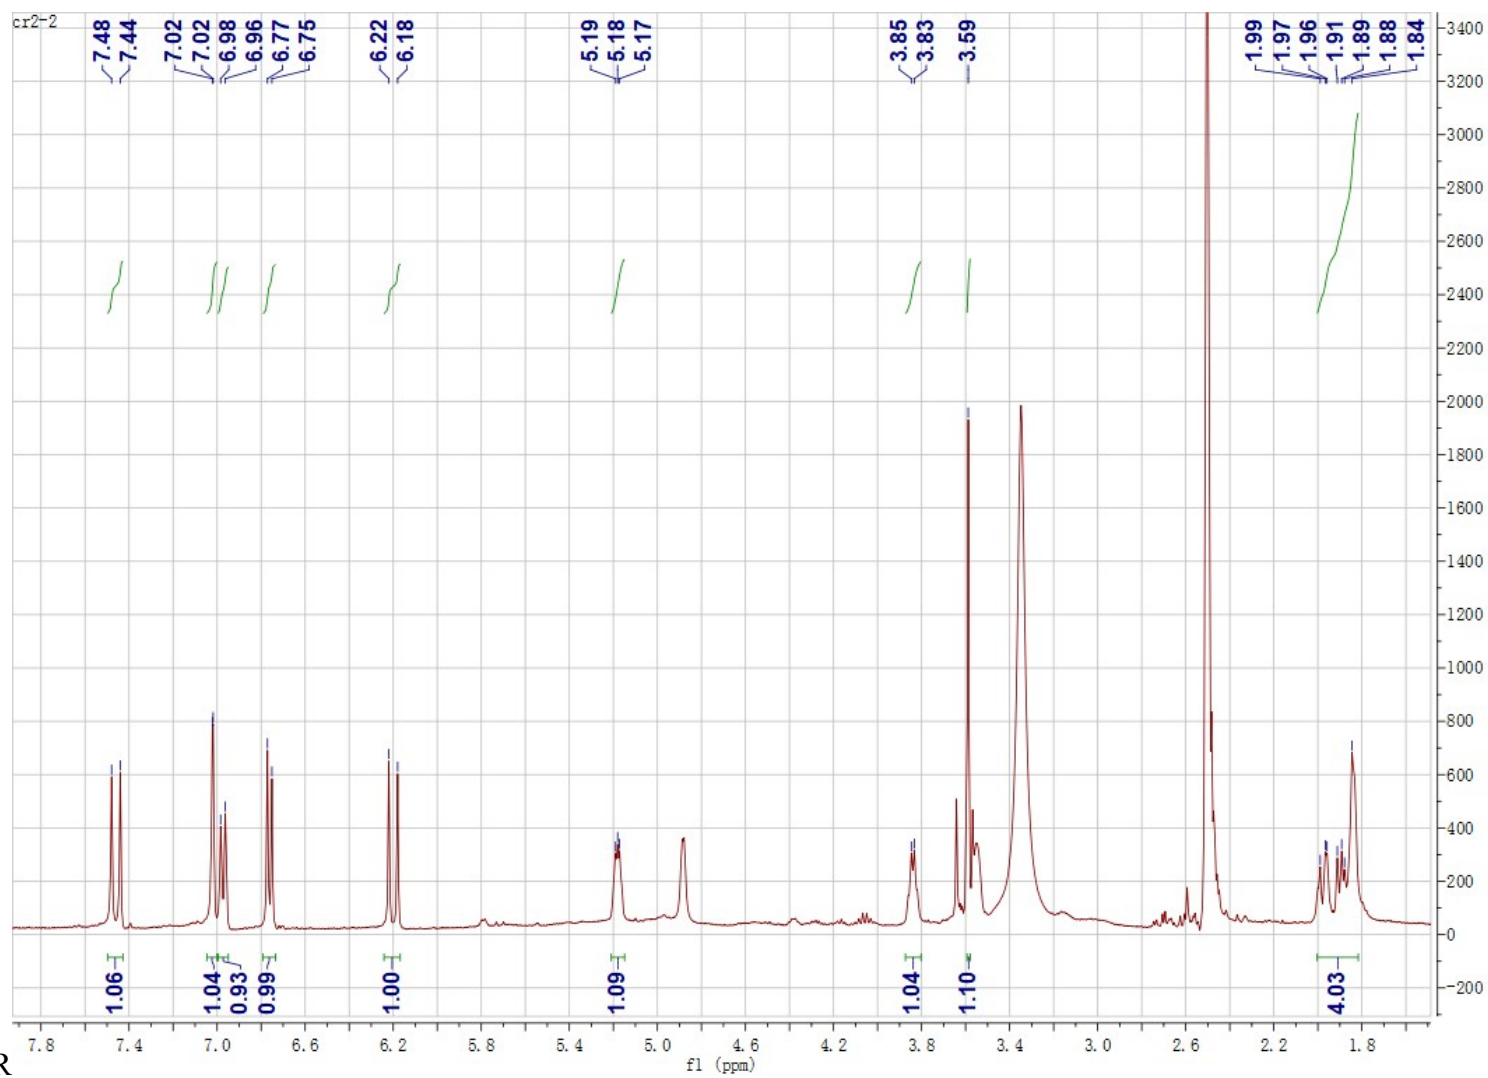

Compound VII  $^1\text{H-NMR}$
